# Supplementary material
Source: publisher figshare collection journal article supplement (https://acs.figshare.com/ndownloader/files/5125348)
Supplement: Supplementary file 1 [file 5125348]

# Discovery of Diphenyloxazole and N $\delta$ -Z-Ornithine Derivatives as Highly Potent and Selective EP<sub>4</sub> Receptor Antagonists

Kouji Hattori, Akira Tanaka, Naoaki Fujii, Hisashi Takasugi, Yoshiyuki Tenda, Masayuki Tomita, Shoko Nakazato, Keiko Nakano, Yasuko Kato, Yutaka Kono, Hidetsugu Murai, Kazuo Sakane,

## Supporting Information

### Experimental method

**3-[[1S)-2-(4,5-diphenyl-1,3-oxazol-2-yl)-2-cyclohexen-1-yl]methyl]benzoic acid (3):** To a solution of **6** (42g) in dichloromethane (800mL) were added trifluoromethanesulfonic acid anhydride (26mL) and 2,6-lutidine (24mL) at -78 $\square$ . After being stirred for 2 h at the same temperature, the solvent was evaporated in vacuo. The residue was diluted with ethyl acetate and the mixture was washed with water, sat. NaHCO<sub>3</sub> and brine. The dried solvent was evaporated in vacuo and the residue was solved into a mixture of methanol (200mL) and DMF (400mL). To the mixture were added 1,3-bis(diphenylphosphino)propane (7.8g), palladium acetate (4.2g), and triethylamine (40mL). After being stirred for 5h at 80 $\square$  under CO<sub>2</sub> atmosphere, the mixture was partitioned between ethyl acetate and water and the organic layer was washed with 1N-HCl, sat. NaHCO<sub>3</sub>, and brine. The dried solvent was evaporated in vacuo and the obtained residue was purified by chromatography on silica gel to give corresponding methyl ester. To a solution of the ester derivative of a mixture of methanol (500mL) and THF (500mL) was added 1N-NaOH (400mL). After being stirred over night, the solvent was removed. The residue was partitioned between ethyl acetate and 1N-HCl and the organic layer was washed with brine. The dried solvent was evaporated in vacuo and the obtained solid was washed with ether to afford 3-[[1S)-2-(4,5-diphenyl-1,3-oxazol-2-yl)-2-cyclohexen-1-yl]methyl]benzoic acid (**3**) (69% from **6**, 31.5g).

<sup>1</sup>H NMR (200MHz, CDCl<sub>3</sub>)  $\delta$  1.4-1.9(4H, m), 2.2-2.4(2H, m), 2.65(1H, dd, J = 10.0, 13.0Hz), 3.2(1H, m), 3.35(1H, dd, J = 3.0, 13.0Hz), 6.93(1H, t, J = 3.8Hz), 7.2-7.8(12H, m), 7.93(1H, d, J = 8.0Hz), 8.10(1H, s)

API-ESMS: 436 (M<sup>+</sup>+H).

Anal. Calcd for C<sub>29</sub>H<sub>25</sub>NO<sub>3</sub>+0.76H<sub>2</sub>O: C, 77.54; H, 5.92; N, 3.12. Found: C, 77.54; H, 6.11; N, 2.97.

**N-(benzyloxy)-3-[[1S)-2-(4,5-diphenyl-1,3-oxazol-2-yl)-2-cyclohexen-1-yl]methyl]benzamide (7):** To a solution of **3** (100mg, 1eq) in DMF were added TBTU (1.5eq) and benzyloxyamine (2eq). After being stirred for 2h, the mixture was partitioned between ethyl acetate and water and the organic layer was washed with 1N-HCl, sat. NaHCO<sub>3</sub>, and brine. The dried solvent was evaporated in vacuo and the obtained residue was purified by chromatography on silica gel to afford N-(benzyloxy)-3-[[1S)-2-(4,5-diphenyl-1,3-oxazol-2-yl)-2-cyclohexen-1-yl]methyl]benzamide (**7**) (89%, 110 mg).

<sup>1</sup>H NMR (200MHz, CDCl<sub>3</sub>)  $\delta$  1.4-1.8(4H, m), 2.2-2.4(2H, m), 2.59(1H, dd, J = 9.8, 12.0Hz), 3.1(1H, m), 3.31(1H, dd, J = 3.8, 12.0Hz), 6.92(1H, t, J = 3.8Hz), 7.2-7.8(14H, m), 8.61(1H, s)

API-ESMS: 541 (M<sup>+</sup>+H).

Anal. Calcd for C<sub>36</sub>H<sub>32</sub>N<sub>2</sub>O<sub>3</sub>+0.99H<sub>2</sub>O: C, 79.70; H, 6.31; N, 5.16. Found: C, 79.70; H, 6.31; N, 5.16.

**N-(benzylsulfonyl)-3-[[1S)-2-(4,5-diphenyl-1,3-oxazol-2-yl)-2-cyclohexen-1-yl]methyl]benzamide (8):** To a solution of **3** (15g.) and benzylsulfonamide (5.9g) in DMF (230mL) were added ethyl-3-(3'-dimethylaminopropyl)carbodiimide hydrochloride (13g) and 4-dimethylaminopyridine (6.3g). After being stirred for 16h, the mixture was partitioned between ethyl acetate and water and the organic layer was washed with 1N-HCl, sat. NaHCO<sub>3</sub>, and brine. The dried solvent was evaporated in vacuo and the obtained residue was

purified by chromatography on silica gel to afford N-(benzylsulfonyl)-3-[[{(1S)-2-(4,5-diphenyl-1,3-oxazol-2-yl)-2-cyclohexen-1-yl]methyl}benzamide (**8**) (89%, 18.1g).

<sup>1</sup>H NMR (200MHz, CDCl<sub>3</sub>) δ 1.4-1.9(4H, m), 2.2-2.5(2H,m), 2.61(1H, dd, J = 11.0, 13.0Hz), 3.05(1H, m), 3.28(1H, dd, J = 3.8, 13.0Hz), 4.66(1H, d, J = 14.2Hz), 4.76(1H, d, J = 14.2Hz), 6.92(1H, t, J = 3.8Hz), 7.2-7.8(19H, m), 8.67(1H, s)

API-ESMS: 589 (M<sup>+</sup>+H).

Anal. Calcd for C<sub>36</sub>H<sub>32</sub>N<sub>2</sub>O<sub>4</sub>S+1.98 H<sub>2</sub>O: C, 69.25; H,5.60; N, 4.49. Found: C, 69.25; H, 5.26; N, 4.42.

#### Solid phase synthesis for **11**:

step-1. A solution of Fmoc-eAhx-OH(N-Fmoc-6-aminohexanoic acid)(180mg) and diisopropylethylamine (0.12mL) in dichloromethane(3mL) was added to a reaction vessel containing Cl-tryptyl resin (200mg, 1.3mmol/g,loading). After the vessel was shaken for 12h at a ambient temperature, the resin was washed with dichloromethane and THF, DMF, and dichloromethane.

step-2 After cleavage Fmoc using 20% piperazine in DMF(5mL), Fmoc-Orn(Z)-OH(254mg) and TBTU(170mg) and HOBt(70mg) and diisopropylethylamine(0.18mL) was added to a solution of the obtained resin in DMF(3mL). After the vessel was shaken for 12h at a ambient temperature, the resin was washed with dichloromethane and THF, DMF, and dichloromethane.

step-3.After cleavage Fmoc using 20% piperazine in DMF(5mL), benzofuran-2-carboxylic acid (210mg) and 1,3-diisopropylcarbodiimide(0.21mL) and diisopropylethylamine(0.23mL) was added to a solution of the obtained resin in dichloromethane(3mL). After the vessel was shaken for 12h at a ambient temperature, the resin was washed with dichloromethane and THF, DMF, and dichloromethane.

step-4. Cleavage from resin was performed with 1% trifluoromethanesulfonic acid in dichloromethane (5mL) for 10min at an ambient temperature. After the filtrated solvent was evaporated under pressure, the residue was washed with ether to give 6-[[{(2S)-2-[(1-benzofuran-2-ylcarbonyl)amino]-5-[[{(benzyloxy)carbonyl]amino} pentanoyl)amino]hexanoic acid (**11**) (100mg, 72%).

<sup>1</sup>H NMR (200MHz,DMSO-d<sub>6</sub>) δ 1.0-1.8(10H, m), 1.86(2H, t, J = 7.6Hz), 2.9-3.2(4H, m), 4.39(1H, m), 4.98(2H, s), 7.0-7.8(10H, m)

API-ESMS: 546 (M<sup>+</sup>+H).

Anal. Calcd for C<sub>28</sub>H<sub>32</sub>N<sub>3</sub>NaO<sub>7</sub>+4.87H<sub>2</sub>O: C,53.11; H,5.93; N, 6.37. Found: C,53.11; H, 6.40; N,6.64.

**Table 3.** SAR of the dipeptide derivatives<sup>a</sup>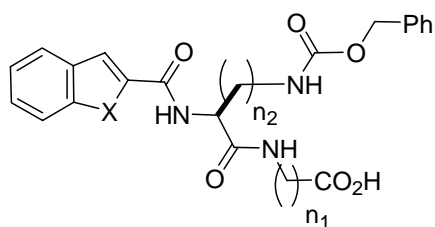

| $n_1$ | $n_2$         | X   | EP <sub>4</sub> : Ki (nM) |
|-------|---------------|-----|---------------------------|
| 1     | 3             | NH  | >1000                     |
| 3     | 3             | NH  | 41                        |
| 5     | 3             | NH  | 0.83                      |
| 5     | 3             | O   | 0.91                      |
| 6     | 3             | O   | 3.0                       |
| 5     | 1             | O   | >1000                     |
| 5     | 2             | O   | >1000                     |
| 5     | 4             | O   | 8.4                       |
| 5     | 4( <i>R</i> ) | O   | 240                       |
| 5     | 3             | S   | 1.8                       |
| 5     | 3             | C=C | 1.2                       |

<sup>a</sup> The results were presented as the average of two experiments. Assays were performed by the reported method, see in ref 2 and 4.
